# Supplementary material for: KIT-5 Structural and Textural Changes in Response to Different Methods of Functionalization with Sulfonic Groups
Source: MDPI journal article supplement (doi:10.3390/ijms24032165), 2023-01-21
Supplement: s1 [file s1]

KIT-5 Structural and Textural Changes in Response to Different Methods of Functionalization with Sulfonic Groups

Sylwia Chałupniczak, Izabela Nowak\* and Agata Wawrzyńczak

Faculty of Chemistry, Adam Mickiewicz University in Poznań, Uniwersytetu Poznańskiego 8, 61-614 Poznań, Poland

\* Correspondence: nowakizak@amu.edu.pl

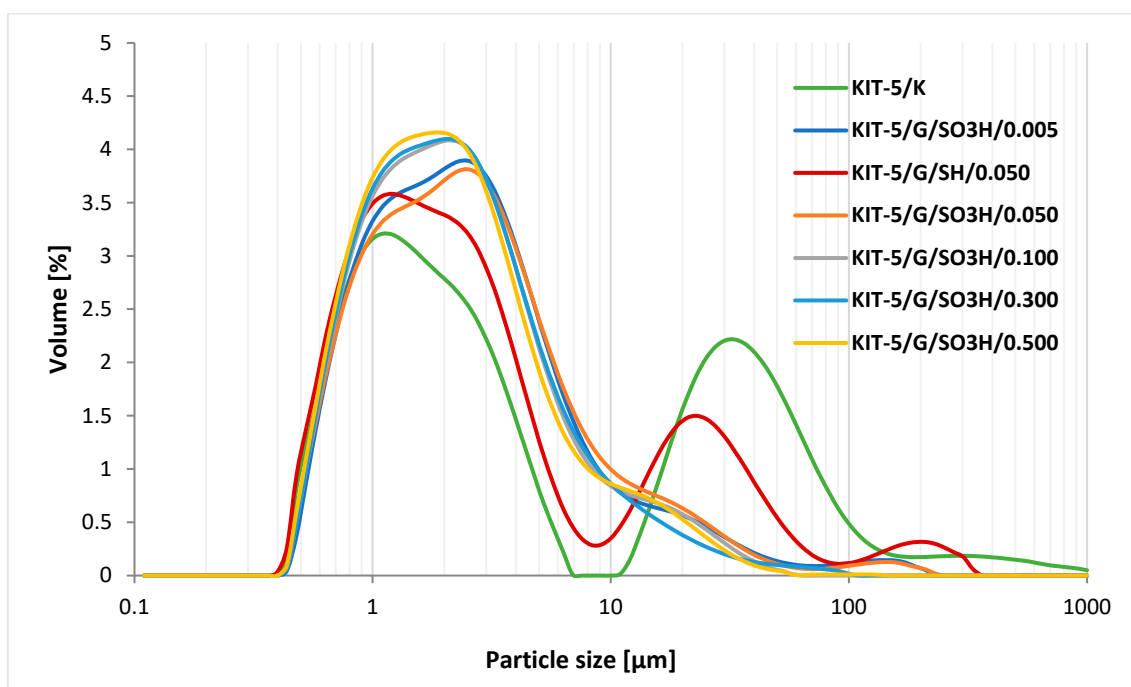

(a)

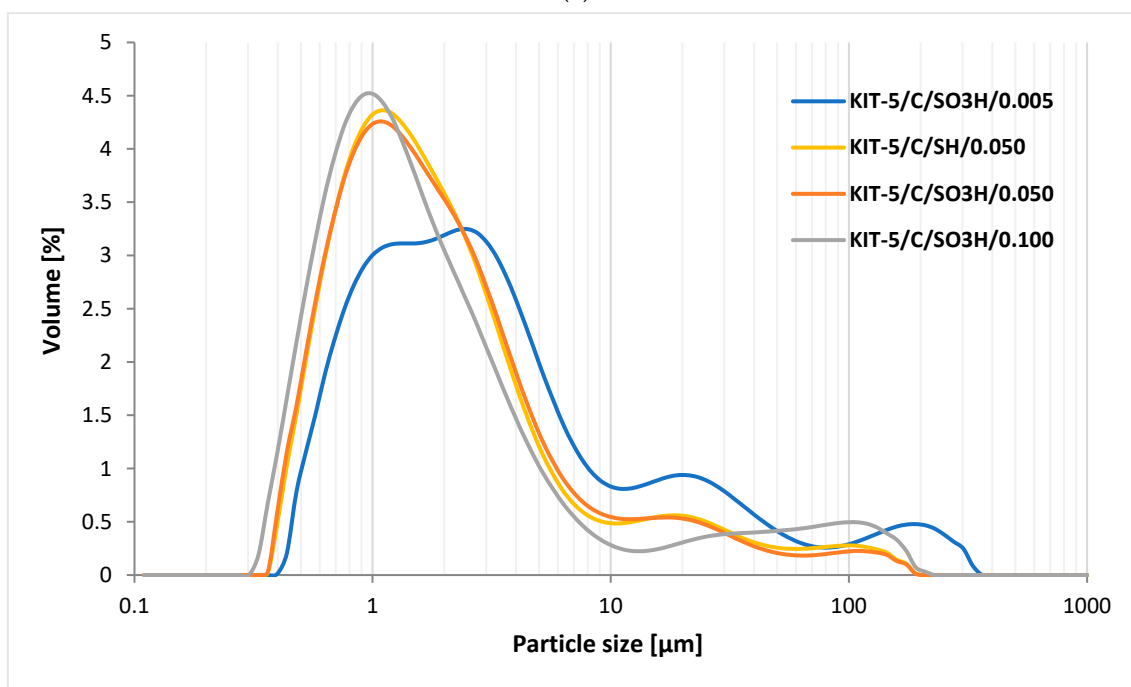

(b)

**Figure S1.** Comparison of the particle size distribution for the KIT-5 samples functionalized by (a) grafting or (b) co-condensation.

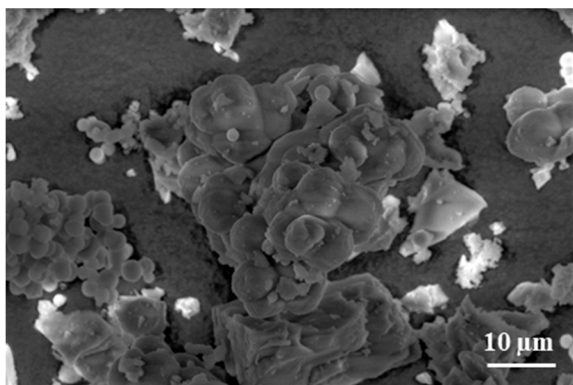

(a)

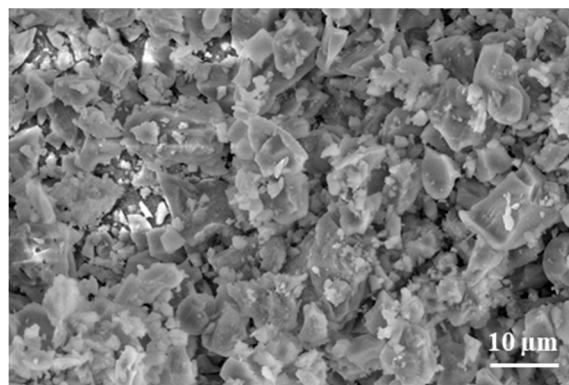

(b)

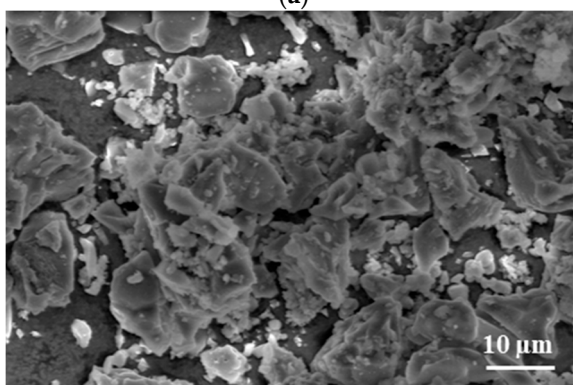

(c)

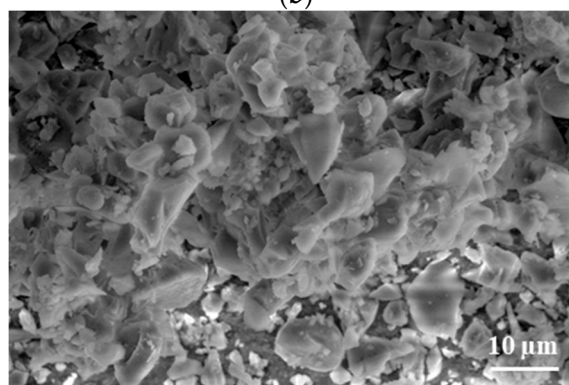

(d)

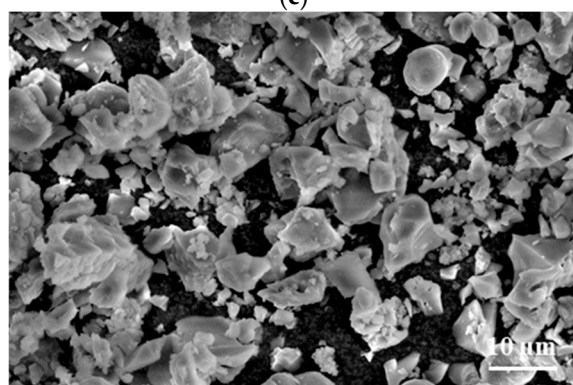

(e)

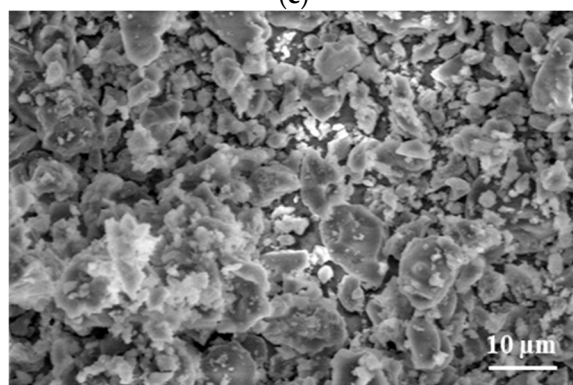

(f)

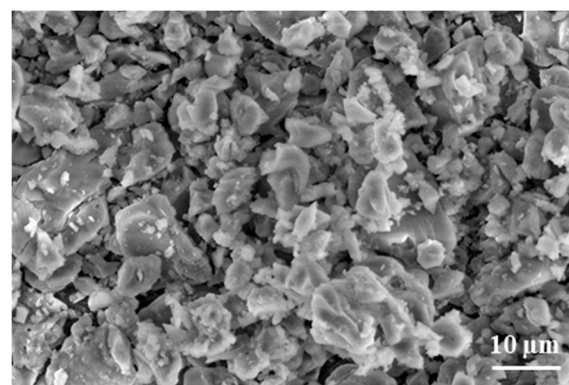

(g)

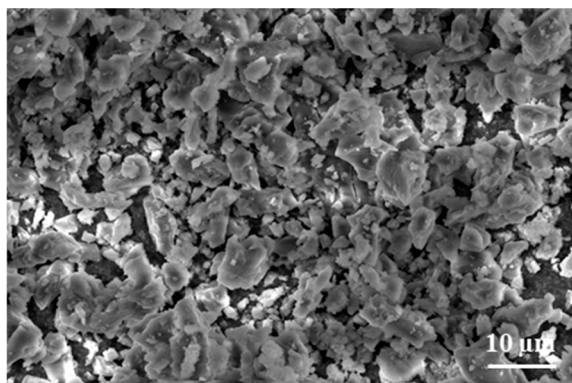

(h)

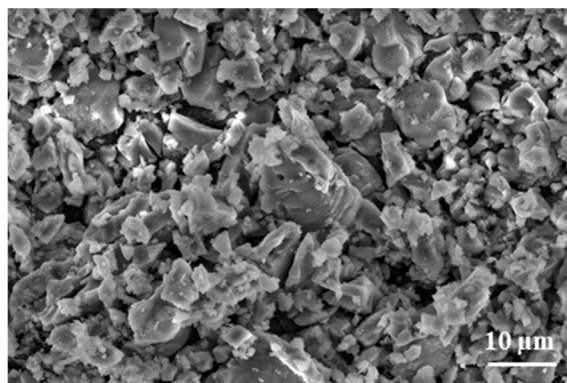

(i)

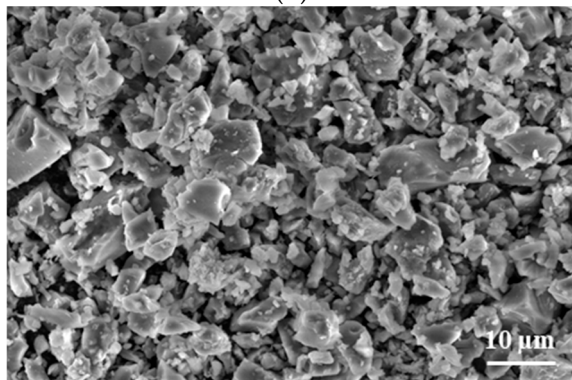

(j)

**Figure S2.** SEM micrographs of unmodified materials (a) KIT-5/K and (f) KIT-5/E, materials modified with sulfonic groups introduced by grafting: (b) KIT-5/G/SO<sub>3</sub>H/0.005, (c) KIT-5/G/SH/0.050, (d) KIT-5/G/SO<sub>3</sub>H/0.050, (e) KIT-5/G/SO<sub>3</sub>H/0.100 and by co-condensation: (g) KIT-5/C/SO<sub>3</sub>H/0.005, (h) KIT-5/C/SH/0.050, (i) KIT-5/C/SO<sub>3</sub>H/0.050, (j) KIT-5/C/SO<sub>3</sub>H/0.100.
